# Supplementary material
Source: PubMed Central journal article supplement (PMC8727643)
Supplement: NIHMS1722865-supplement-Supp_data.pdf [file NIHMS1722865-supplement-Supp_data.pdf]

**Supplemental Table 1.** Reasons for denial for transplant candidacy. Some patients were declined for more than one reason.

| <b>Reason for Denial</b>                                     | <b>Number of Patients (%)</b> |
|--------------------------------------------------------------|-------------------------------|
| <b>Psychiatric:</b> depression, addiction, compliance issues | 27 (43%)                      |
| <b>Social:</b> lack of caregiver support                     | 20 (32%)                      |
| <b>Neuro:</b> cognitive issues                               | 1 (1.5%)                      |
| <b>Cardiac:</b> heart failure, CAD                           | 7 (11%)                       |
| <b>Renal:</b> Chronic kidney disease                         | 3 (4.7%)                      |
| <b>GI:</b> esophageal dysmotility, gastroparesis             | 7 (11%)                       |
| <b>Endocrine:</b> thyroid lesion                             | 1 (1.5%)                      |
| <b>Other<sup>a</sup></b>                                     | 17 (27%)                      |

*Abbreviations:* neuro, neurological; HF, heart failure; CAD, coronary artery disease; CKD, chronic kidney disease; GI, gastrointestinal

<sup>a</sup> Other included patients referred too early, inadequate finances, deconditioning, diagnosed with lung cancer, refusal of blood products, patient declined transplant

**Supplemental Table 2.** Medical treatment for AE-ILD

|                                        | <b>AE-ILD;<br/>No Transplant<br/>(n = 28)</b> | <b>AE-ILD;<br/>Transplant<br/>(n=25)</b> | <b>p value</b> |        |
|----------------------------------------|-----------------------------------------------|------------------------------------------|----------------|--------|
| <b>Respiratory Support (%)</b>         |                                               |                                          |                |        |
|                                        | <b>High-flow Nasal Cannula</b>                | 16 (57%)                                 | 19 (76%)       | 0.245  |
|                                        | <b>Mechanical Ventilation</b>                 | 11 (39%)                                 | 0 (0%)         | 0.0003 |
|                                        | <b>Inhaled Pulmonary Vasodilator</b>          | 0                                        | 8 (32%)        | 0.0012 |
|                                        | <b>ECMO</b>                                   | 1 (3.6%)                                 | 1 (4%)         | >0.99  |
| <b>Augmented Immunosuppression (%)</b> |                                               |                                          |                |        |
|                                        | <b>Corticosteroids<sup>a</sup></b>            | 22 (79%)                                 | 9 (36%)        | 0.002  |
|                                        | <b>Cyclophosphamide</b>                       | 2 (7%)                                   | 0 (0%)         | 0.49   |

*Abbreviations:* AE-ILD, acute exacerbation of interstitial lung disease; ECMO, extracorporeal membrane oxygenation

<sup>a</sup> Dose of corticosteroid in AE-ILD ranged from prednisone 40mg daily for 5 days to methylprednisolone 1 gram daily for 3 days.

**Supplemental Table 3. Post-Transplant Readmission Data**

|                                                            | <b>AE-ILD;<br/>Transplant<br/>(n = 25)</b> | <b>Stable ILD;<br/>Transplant<br/>(n = 67)</b> | <b>p value</b> |
|------------------------------------------------------------|--------------------------------------------|------------------------------------------------|----------------|
| <b>90 day readmission rate after<br/>transplant (n, %)</b> | 9 (36%)                                    | 28 (42%)                                       | 0.64           |
| <b>Total number of hospital<br/>readmissions</b>           | 23                                         | 61                                             |                |
| <b>Readmission diagnosis</b>                               |                                            |                                                | 0.062          |
| <b>Rejection (n, %)</b>                                    | 4(16%)                                     | 16 (26%)                                       |                |
| <b>Infection (n, %)</b>                                    | 3 (12%)                                    | 18 (30%)                                       |                |
| <b>VTE (n, %)</b>                                          | 1 (4%)                                     | 7 (11%)                                        |                |
| <b>Surgical wound dehiscence (n,<br/>%)</b>                | 0 (0%)                                     | 3 (5%)                                         |                |
| <b>Acute renal failure (n, %)</b>                          | 1 (4%)                                     | 4 (7%)                                         |                |
| <b>Other<sup>a</sup></b>                                   | 14 (56%)                                   | 13 (21%)                                       |                |

*Abbreviations:* AE-ILD, acute exacerbation of interstitial lung disease; ILD, interstitial lung disease; VTE, venous thromboembolism

<sup>a</sup> Other diagnoses included atrial fibrillation, admission for hiatal hernia repair, and admission for subtherapeutic immunosuppression

**Supplemental Table 4.** Histopathology from explanted lungs from patients that underwent transplantation.

|                                     | <b>AE-ILD;<br/>Transplant<br/>(n=25)</b> | <b>Stable ILD;<br/>Transplant<br/>(n=67)</b> | <b>p value</b> |
|-------------------------------------|------------------------------------------|----------------------------------------------|----------------|
| <b>Explant Pathology</b>            |                                          |                                              |                |
| <b>Organizing Pneumonia</b>         | 8 (32%)                                  | 10 (15%)                                     | 0.08           |
| <b>Diffuse Alveolar Damage</b>      | 0                                        | 3 (4%)                                       | 0.56           |
| <b>NSIP</b>                         | 1 (4%)                                   | 9 (13%)                                      | 0.28           |
| <b>Airway-centered Inflammation</b> | 10 (40%)                                 | 20 (30%)                                     | 0.45           |
| <b>Emphysema</b>                    | 7 (28%)                                  | 13 (19%)                                     | 0.40           |
| <b>Cancer</b>                       | 1 (4%)                                   | 3 (4%)                                       | >0.99          |
| <b>Honeycombing</b>                 | 23 (92%)                                 | 63 (94%)                                     | 0.66           |
| <b>Other<sup>a</sup></b>            | 12 (48%)                                 | 36 (54%)                                     | 0.65           |

NSIP, non-specific interstitial pneumonia

<sup>a</sup>Other pathological findings were: lymphoplasmacytic infiltrate, desquamative interstitial pneumonia, loosely formed granulomas, bronchiolitis, pleuroparenchymal fibroelastosis.
